# Supplementary material for: Polycyclic Aromatic Hydrocarbon-Degrading Bacteria in Three Different Functional Zones of the Cities of Moscow and Murmansk
Source: Microorganisms. 2022 Oct 6;10(10):1979. doi: 10.3390/microorganisms10101979 (PMC9610461; doi:10.3390/microorganisms10101979)
Supplement: Supplementary file 1 [file microorganisms-10-01979-s001.zip]

Archive with 9 entries (9 files):
- Figure S1.jpg
- Figure S2.jpg
- Figure S3.jpg
- Figure S4.jpg
- Figure S5.jpg
- Figure S6.jpg
- Figure_S7.jpg
- Supplementary material.pdf
- Table S1_Sazonova et al.xlsx
