# Supplementary material for: Polycyclic Aromatic Hydrocarbon-Degrading Bacteria in Three Different Functional Zones of the Cities of Moscow and Murmansk
Source: Microorganisms. 2022 Oct 6;10(10):1979. doi: 10.3390/microorganisms10101979 (PMC9610461; doi:10.3390/microorganisms10101979)
Supplement: Supplementary file 1 [file microorganisms-10-01979-s001.zip › Table S1_Sazonova et al.xlsx]

## Sheet: Table S1
OUT	M TP	M RP	M GP	M TL	M RL	M GL	U TP	U RP	U GP	U TL	U GL	U RL
Rhodococcus	337	239	145	48	15	24	3303	697	1675	202	165	90
Bacillus	230	230	184	1770	165	362	55	665	88	441	298	271
Micrococcus	41	13	21	13	29	8	13	3	2	64	113	20
Methylorubrum	3	0	0	0	0	0	0	0	0	0	3	0
Acinetobacter	29	13	1	11	77	3	34	3	2	66	62	16
Arthrobacter	1306	706	999	409	271	67	345	177	12	670	381	161
Pseudomonas	14	33	1	1266	859	267	11	46	6	106	1689	129
Microbacterium	116	38	40	20	30	20	74	70	1	112	23	38
Paenibacillus	2	6	3	20	23	12	6	15	1	47	69	18
Rothia	0	0	0	110	133	44	4	1	0	308	138	109
Pantoea	0	0	0	186	60	28	0	0	0	28	63	345
Phyllobacterium	1	3	2	2	0	1	0	1	5	700	0	0
Pseudarthrobacter	2	0	4	0	0	19	0	2	1	1	35	1
Stenotrophomonas	0	0	0	1	3	0	0	0	0	1	1	0
Nocardioides	2291	1895	2423	268	406	125	2610	4749	74	799	91	656
Exiguobacterium	0	26	0	0	3	1	0	57	0	4	0	1
Methylobacterium	1073	501	1077	1122	92	190	2527	970	1796	353	270	250
Brevundimonas	103	37	31	3	7	5	131	57	3	52	48	39
Staphylococcus	1	73	22	10	41	16	0	48	0	15	51	24
Streptomyces	3	24	16	14	6	11	4	18	1	25	36	22
Leifsonia	12	27	2	19	1	5	10	25	3	16	9	8
Dermacoccus	0	0	0	0	1	0	0	1	23	2	1	1
Gordonia	0	0	0	2	0	1	4	0	0	0	0	0
Rhizobium	15	6	3	3	19	0	29	20	3	8	7	27
Cellulomonas	67	111	103	17	50	16	31	156	7	74	8	77
Curtobacterium	7	6	1	23	0	19	8	9	1	2	3	2
Kocuria	150	5	2	53	16	30	0	1	0	9	8	1
Deinococcus	1075	1549	2211	197	113	25	1682	738	536	163	21	81
Rahnella	0	0	0	0	46	1	0	0	0	2	14	13
Enterobacter	0	0	0	41	4	3967	0	0	1	25	844	85
Moraxella	104	33	5	6	10	0	64	5	1	17	6	1
Shinella	0	0	0	0	0	0	0	0	0	1	0	0
Others Bacteria	98623	97822	118472	96657	95515	94820	100135	113466	101310	81152	84367	89143
